# Supplementary material
Source: publisher figshare collection journal article supplement (https://f1000.figshare.com/ndownloader/files/142958)
Supplement: Supplementary file 1 [file 142958]

MIBGal4>CS Male
Date	# of flies	Day1	Day2	Day3	Day4	Day5	Day6	Day7	Day8	Day9	Day10	Day11	Day12	Day13	Day14	Day15	Day16	Day17	Day18	Day19	Day20	Day21
05/01/2007	12	0	0	0	0	0	0	0	1	1	1	1	1	5	6	8	8	11	12	12	12	12
3/5/2007	13	0	0	0	0	0	0	0	0	0	0	0	0	0	0	3	5	8	11	13	13	13
4/5/2007	10	3	4	4	4	4	4	4	4	5	6	7	9	9	9	10	10	10	10	10	10	10
6/5/2007	11	4	5	6	6	6	6	6	6	6	6	6	6	6	7	10	11	11	11	11	11	11
11/5/2007	10	0	0	1	1	1	1	1	1	1	1	1	1	1	2	7	9	10	10	10	10	10
12/5/2007	9	0	0	0	0	0	0	0	0	0	0	1	2	3	3	5	5	6	8	9	9	9
10/5/2007	10	2	3	4	4	5	6	6	6	6	7	8	9	9	10	10	10	10	10	10	10	10
05/15/2007	11	0	2	3	3	4	5	5	5	5	5	7	7	8	8	8	9	11	11	11	11	11
05/18/2007	12	5	5	5	5	5	5	5	5	5	5	5	5	5	6	8	10	10	11	11	12	12
05/19/2007	11	1	4	4	5	5	6	6	6	6	6	7	7	8	8	9	11	11	11	11	11	11
05/21/2007	14	0	1	1	1	1	1	1	1	1	2	7	7	7	11	13	13	13	14	14	14	14
05/22/2007	11	1	1	1	1	1	2	2	2	2	3	4	5	6	6	8	11	11	11	11	11	11
05/24/2007	14	0	0	1	1	1	1	1	1	1	1	3	3	6	11	13	14	14	14	14	14	14
MIBGal4>dsod1 Male
Date	# of flies	Day1	Day2	Day3	Day4	Day5	Day6	Day7	Day8	Day9	Day10	Day11	Day12	Day13	Day14	Day15	Day16	Day17	Day18	Day19	Day20	Day21
5/3/2007	12	2	2	2	2	2	2	2	3	3	8	9	12	12	12	12	12	12	12	12	12	12
9/3/2007	14	1	1	1	1	1	2	2	2	2	4	7	8	9	10	11	13	13	13	13	13	14
12/3/2007	10	0	0	0	0	0	0	0	0	0	0	0	1	1	2	4	5	7	10	10	10	10
03/15/2007	11	0	0	0	0	0	0	0	0	0	1	2	3	7	8	11	11	11	11	11	11	11
03/18/2007	10	0	0	0	0	0	0	0	1	2	2	5	5	5	6	9	10	10	10	10	10	10
03/20/2007	11	0	0	0	0	0	0	0	1	1	3	5	6	9	10	10	10	11	11	11	11	11
03/27/2007	12	0	0	0	1	1	1	1	1	2	3	4	5	6	8	10	12	12	12	12	12	12
03/30/2007	10	0	0	0	0	0	0	0	0	1	2	4	5	5	8	10	10	10	10	10	10	10
1/4/2007	12	0	1	1	1	1	1	1	1	1	2	3	6	8	12	12	12	12	12	12	12	12
4/4/2007	15	0	0	0	0	0	0	0	0	0	1	9	11	13	14	15	15	15	15	15	15	15
5/4/2007	11	0	1	1	1	1	1	2	5	7	9	10	10	11	11	11	11	11	11	11	11	11
8/4/2007	10	1	2	2	3	4	4	5	6	6	7	8	8	8	8	9	10	10	10	10	10	10
9/4/2007	11	1	1	2	3	3	3	4	5	6	6	8	8	8	10	10	11	11	11	11	11	11
6/4/2007	11	0	1	1	1	1	1	1	1	4	8	10	10	11	11	11	11	11	11	11	11	11
6/4/2007	11	0	1	1	1	1	1	1	1	4	8	10	10	11	11	11	11	11	11	11	11	11
MIBGal4>A4V Male
Date	# of flies	Day1	Day2	Day3	Day4	Day5	Day6	Day7	Day8	Day9	Day10	Day11	Day12	Day13	Day14	Day15	Day16	Day17	Day18	Day19
03/16/2007	11	0	0	0	0	0	0	0	0	0	0	2	3	6	6	9	10	11	11	11
03/18/2007	10	0	1	3	3	3	3	3	3	3	3	4	5	6	7	7	10	10	10	10
03/21/2007	16	0	1	1	1	1	1	1	1	1	2	3	3	6	9	10	15	16	16	16
03/25/2007	14	0	0	0	0	0	0	0	0	0	0	5	5	8	9	13	13	13	13	14
03/26/2007	11	0	0	1	1	1	1	1	1	2	4	4	5	5	8	11	11	11	11	11
03/28/2007	11	0	0	0	0	0	0	0	0	0	0	3	5	7	8	11	11	11	11	11
03/29/2007	17	0	0	0	0	0	0	0	0	1	3	3	7	14	16	16	17	17	17	17
03/30/2007	12	0	1	1	1	1	1	1	1	2	2	5	6	7	10	12	12	12	12	12
1/4/2007	12	0	0	0	0	1	1	1	1	1	2	4	4	6	9	12	12	12	12	12
6/4/2007	10	0	3	3	3	3	3	3	3	3	3	4	6	7	8	10	10	10	10	10
4/4/2007	13	1	4	4	5	5	5	5	5	5	6	7	9	10	13	13	13	13	13	13
10/4/2007	10	0	1	1	1	1	1	1	1	3	4	4	7	9	10	10	10	10	10	10
04/13/2007	17	0	1	1	1	2	2	3	7	7	8	8	14	15	15	16	17	17	17	17
MIBGal4>G85R Male
Date	# of flies	Day1	Day2	Day3	Day4	Day5	Day6	Day7	Day8	Day9	Day10	Day11	Day12	Day13	Day14	Day15	Day16	Day17	Day18	Day19
02/27/2007	13	0	0	0	0	0	0	3	4	11	13	13	13	13	13	13	13	13	13	13
03/24/2007	13	4	6	6	6	6	7	7	8	8	11	11	11	12	12	12	12	13	13	13
11/3/2007	18	0	0	0	0	0	1	2	4	7	7	8	12	14	14	15	16	17	17	18
03/17/2007	14	2	2	3	3	3	3	3	4	4	5	7	8	9	10	11	13	14	14	14
03/18/2007	12	1	1	1	1	1	1	1	1	1	1	1	5	6	7	7	10	12	12	12
03/25/2007	14	0	0	0	1	1	1	2	3	4	5	5	6	7	9	11	12	12	14	14
03/26/2007	18	0	0	0	0	0	0	0	0	0	0	2	7	9	14	16	17	18	18	18
03/28/2007	12	0	0	0	0	0	0	0	1	4	4	6	6	6	8	11	12	12	12	12
03/20/2007	11	0	1	1	1	1	1	1	2	2	2	3	5	5	6	6	8	11	11	11
03/31/2007	19	1	2	2	2	2	2	3	7	8	9	14	15	19	19	19	19	19	19	19
MIBGal4>hSOD1 Male
Date	# of flies	Day1	Day2	Day3	Day4	Day5	Day6	Day7	Day8	Day9	Day10	Day11	Day12	Day13	Day14	Day15	Day16	Day17	Day18	Day19	Day20
22/07/2007	17	0	0	0	0	0	0	0	1	2	4	4	8	11	15	17	17	17	17	17	17
9/3/2007	11	2	3	3	3	3	3	3	3	4	6	6	9	10	11	11	11	11	11	11	11
10/3/2007	20	0	0	0	0	0	0	0	0	0	4	8	9	11	14	16	17	17	19	19	20
03/13/2007	9	1	1	1	1	1	1	4	4	4	5	5	5	6	6	6	6	7	9	9	9
03/17/2007	10	0	1	1	2	2	2	2	2	2	3	3	4	4	5	9	9	9	9	9	10
03/20/2007	23	0	0	0	2	2	3	3	6	6	8	10	14	16	18	21	23	23	23	23	23
03/25/2007	14	0	1	1	1	1	1	1	2	2	3	4	4	4	6	9	12	13	13	14	14
03/26/2007	24	0	1	1	1	1	2	2	2	7	9	11	13	13	13	16	17	18	21	22	24
03/28/2007	14	1	1	1	2	2	2	2	2	3	3	5	7	10	10	11	14	14	14	14	14
03/29/2007	15	0	0	0	0	0	0	0	1	2	2	3	5	5	5	8	13	15	15	15	15
7/4/2007	17	0	0	0	0	0	0	0	2	5	7	8	12	13	15	15	17	17	17	17	17
9/4/2007	11	4	7	7	7	7	7	7	8	8	9	9	9	10	10	10	11	11	11	11	11
03/15/2007	15	1	1	1	1	1	1	1	1	1	2	4	7	7	7	9	9	13	13	15	15
